# Supplementary figures and images for: A Non-Destructive High-Speed Procedure to Obtain DNA Barcodes from Soft-Bodied Insect Samples with a Focus on the Dipteran Section of Schizophora
Source: MDPI journal article supplement (doi:10.3390/insects13080679), 2022-07-27

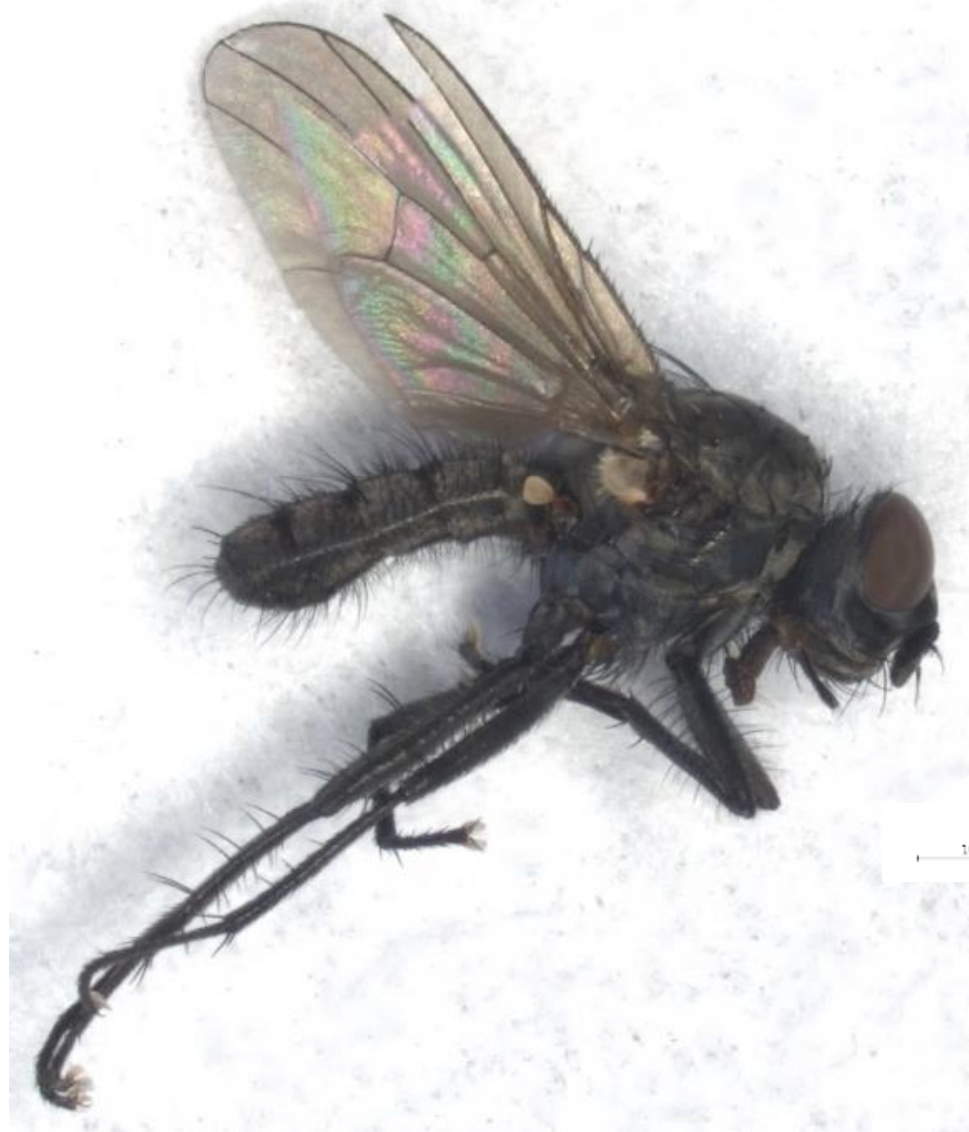

A

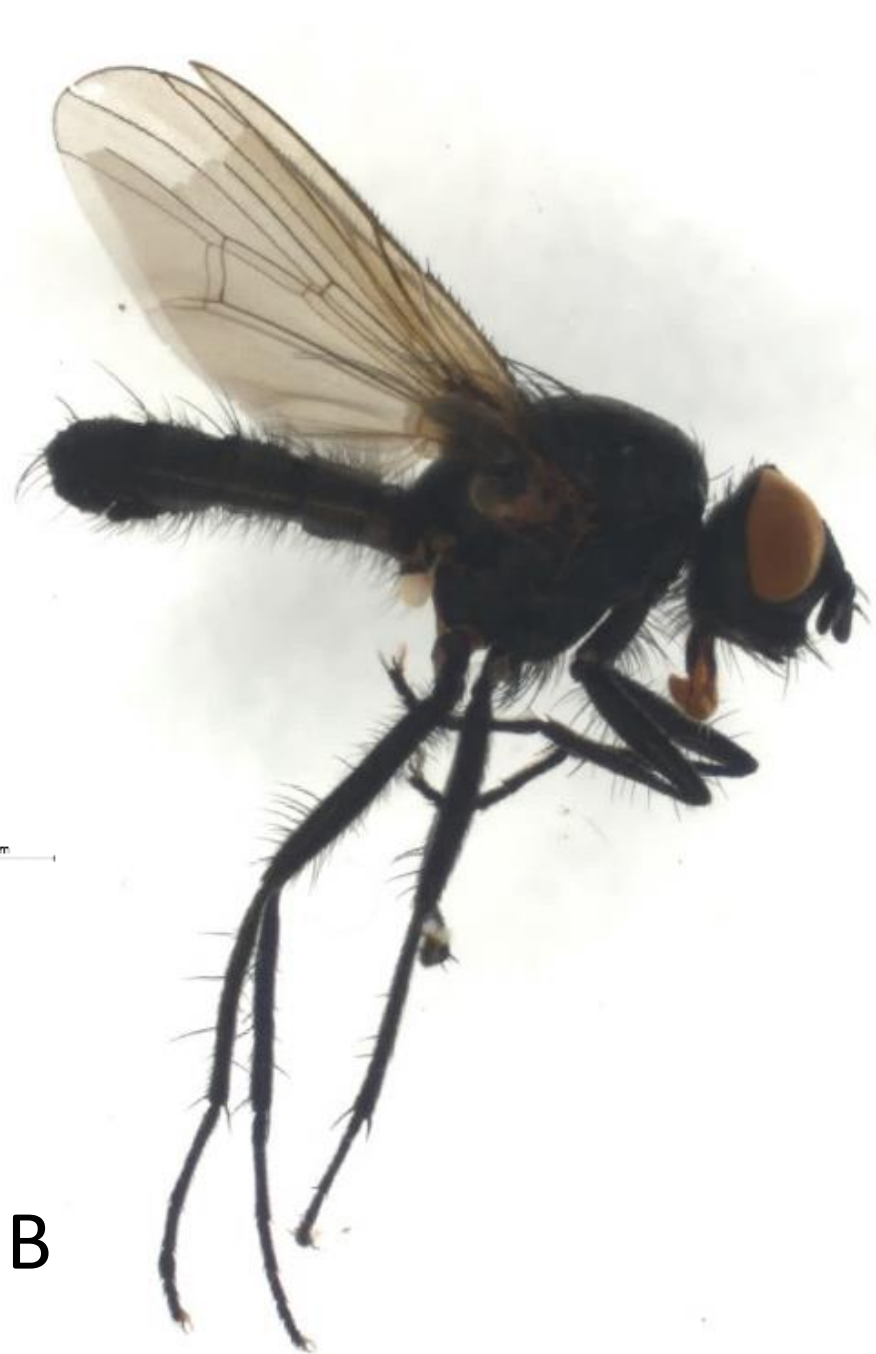

B

Supplement: s1 [file s1]

A

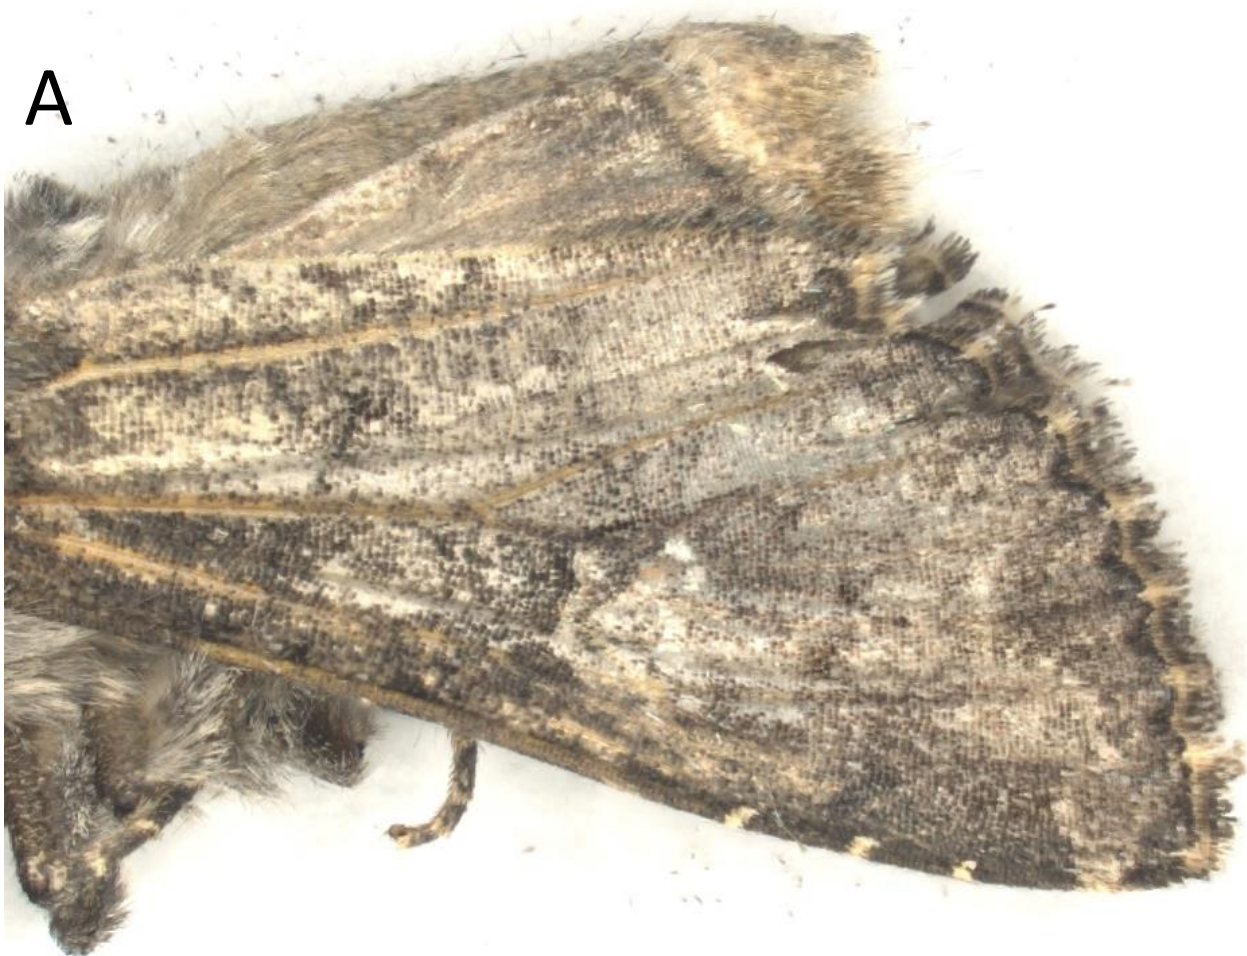

B

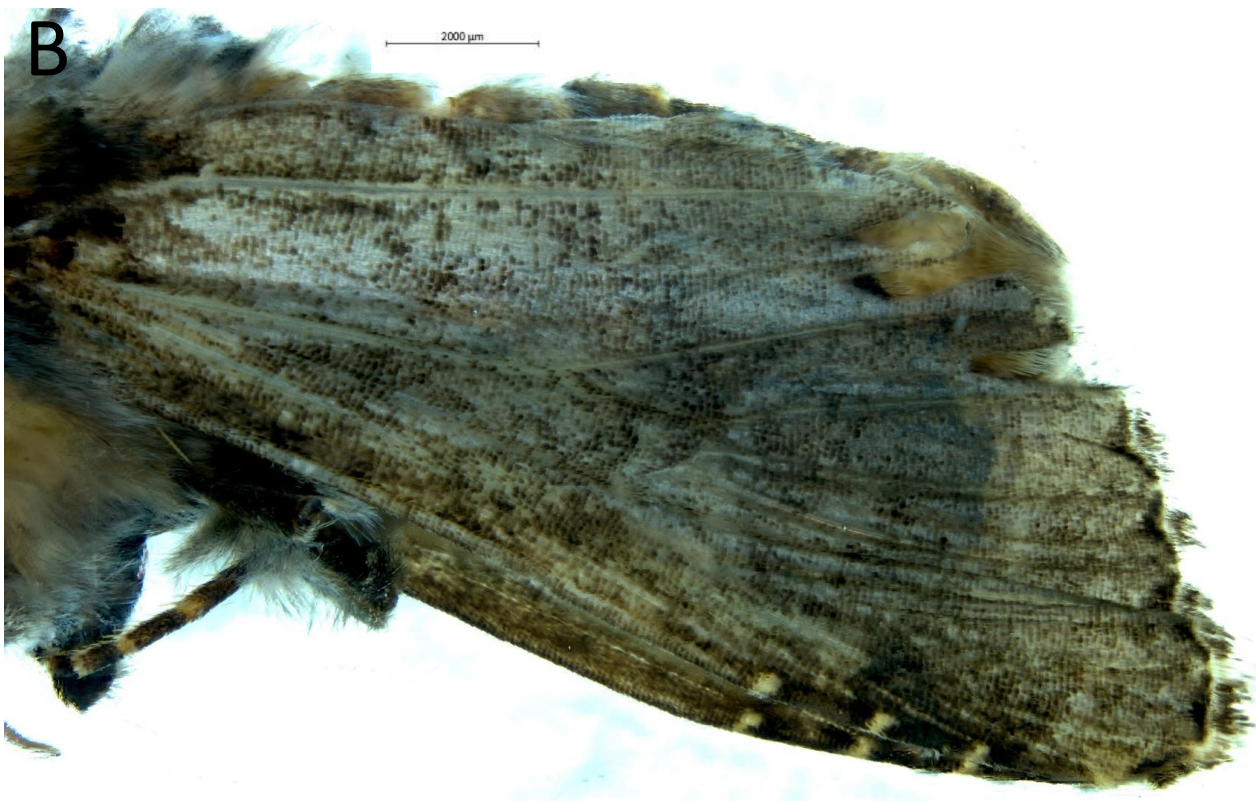

Supplement: s1 [file s1]

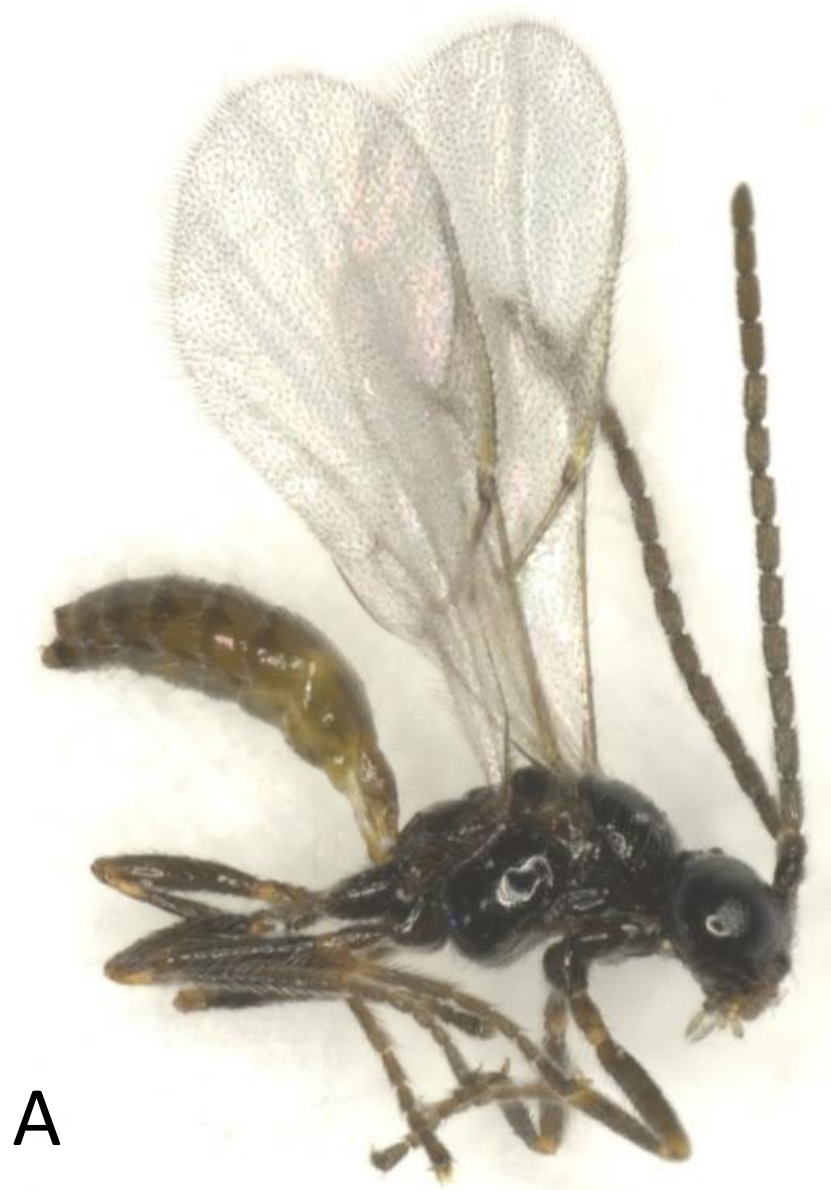

A

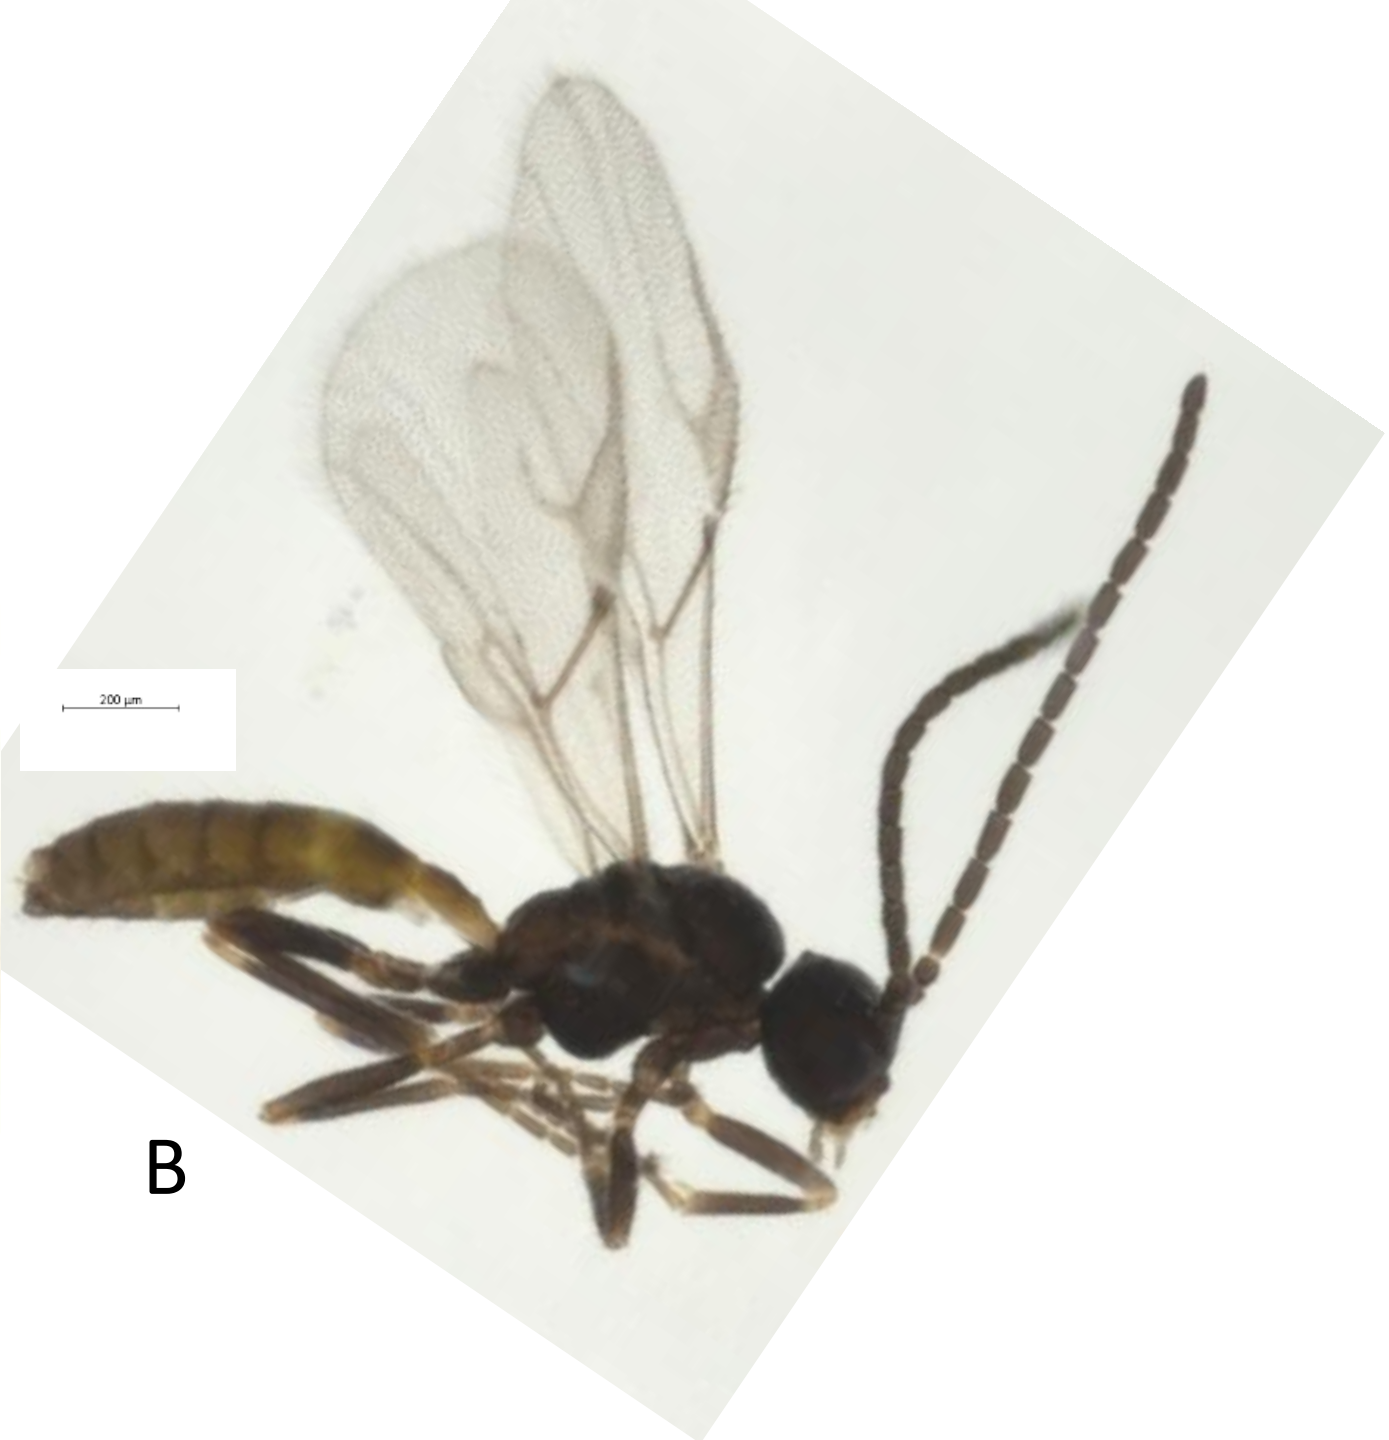

B

Supplement: s1 [file s1]

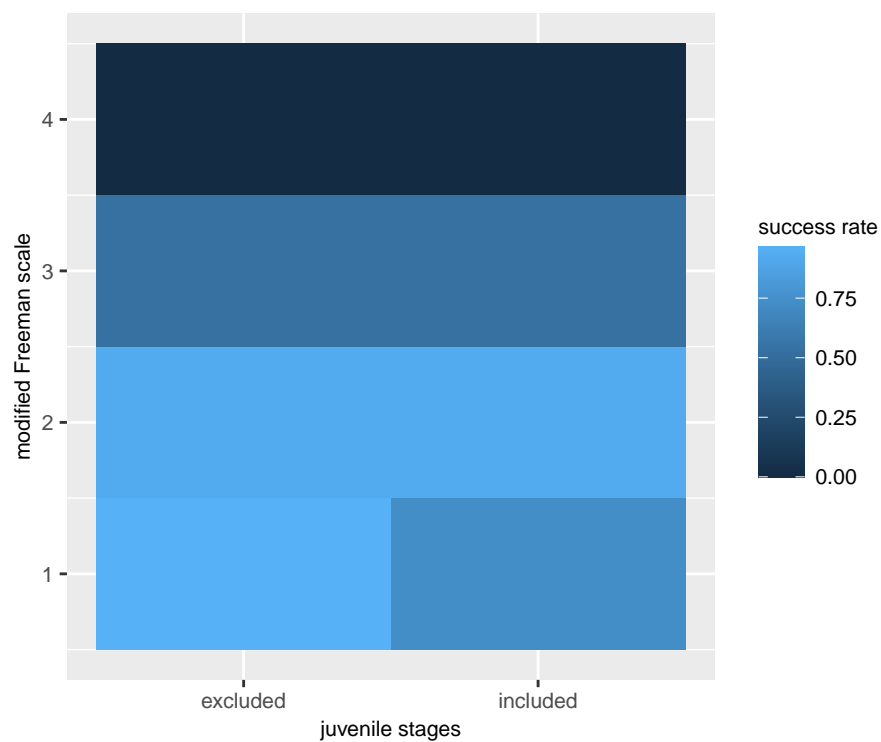

Supplement: s1 [file s1]

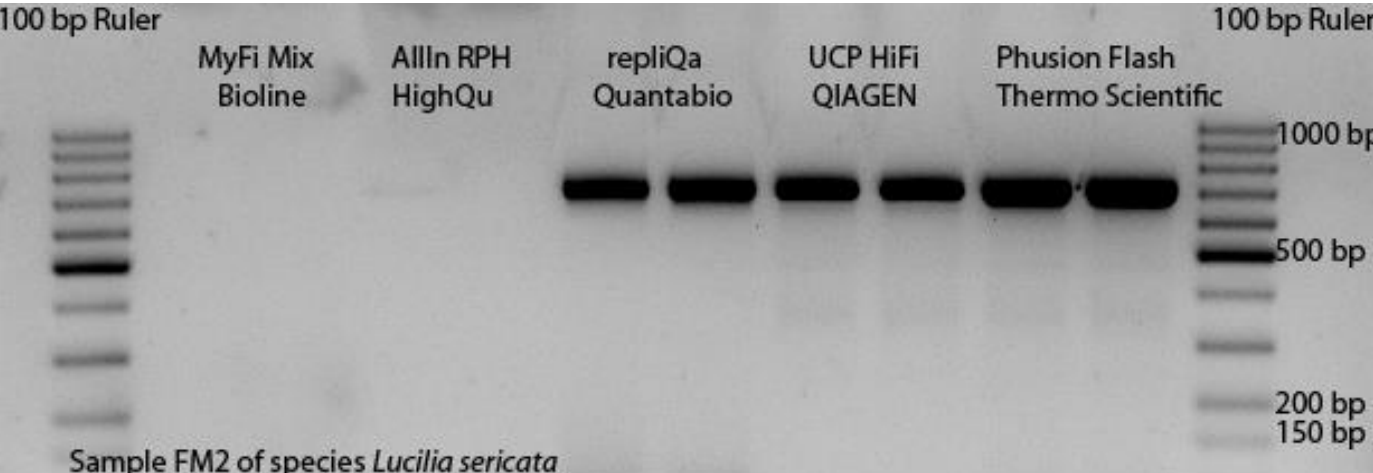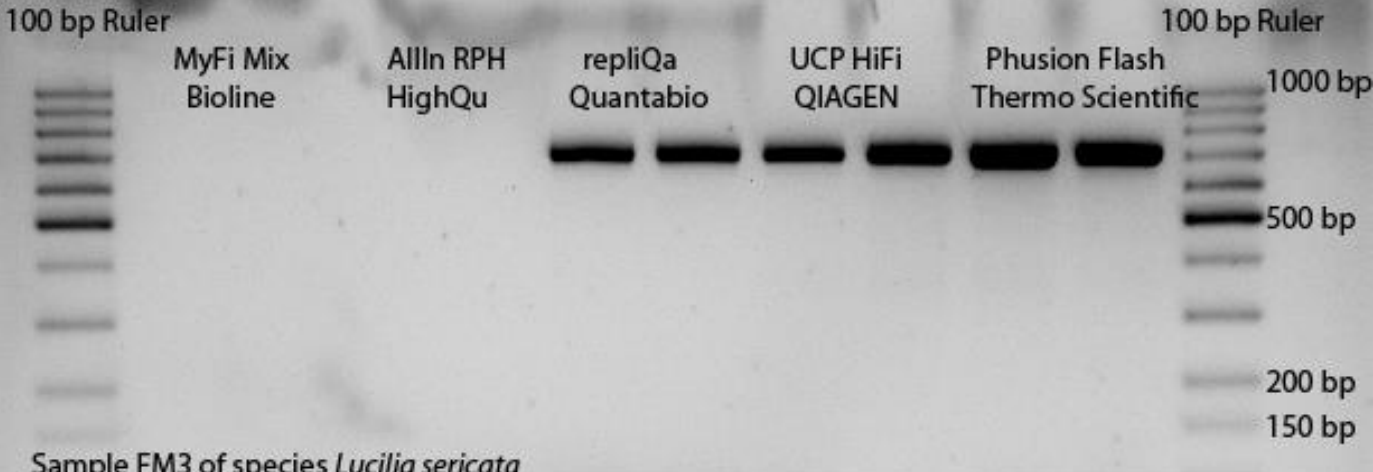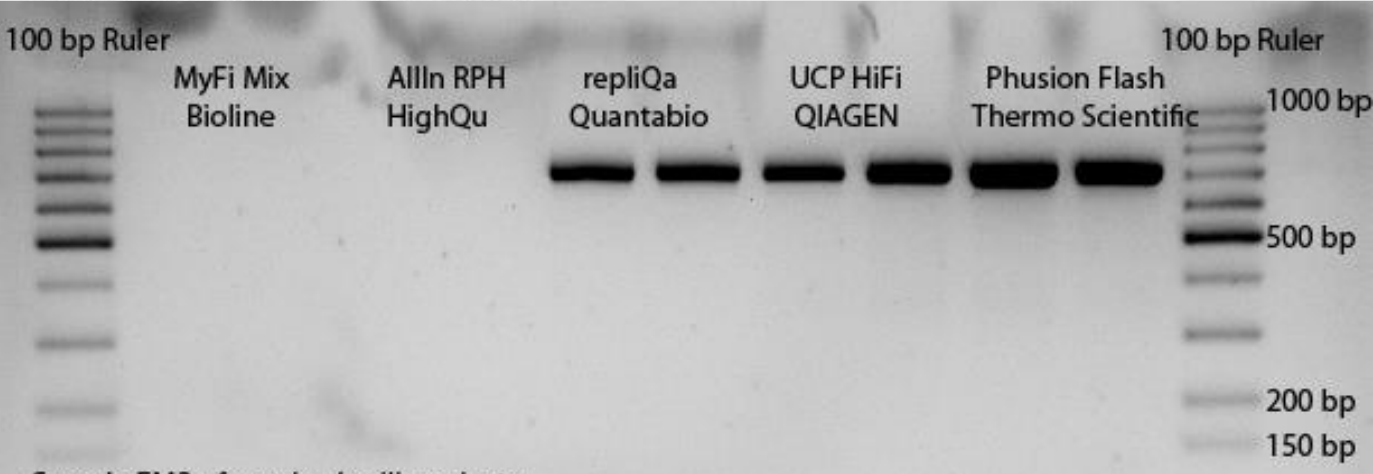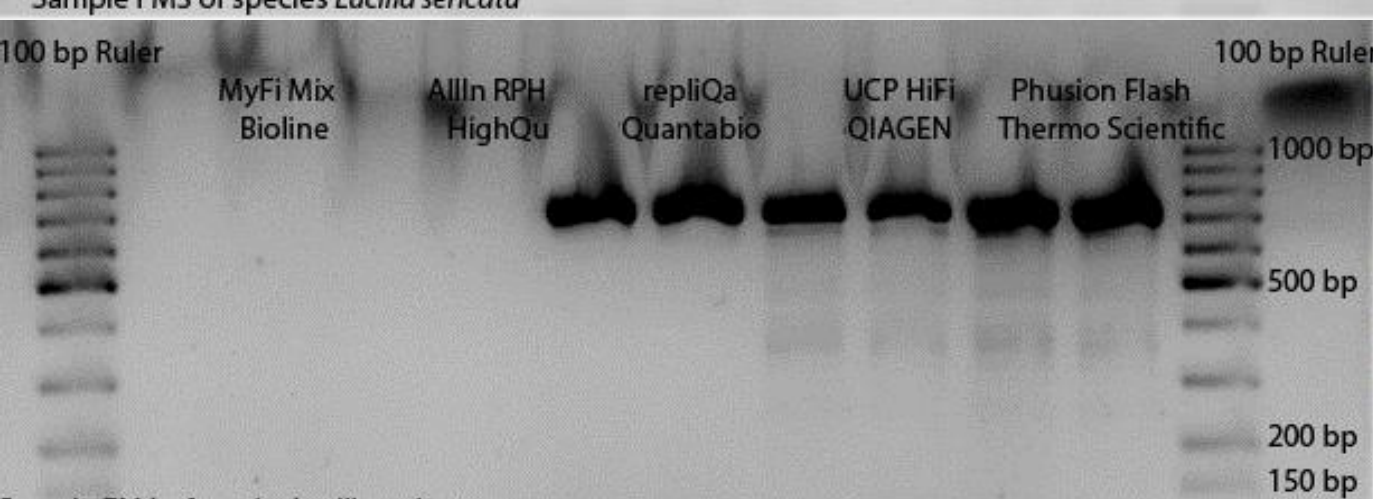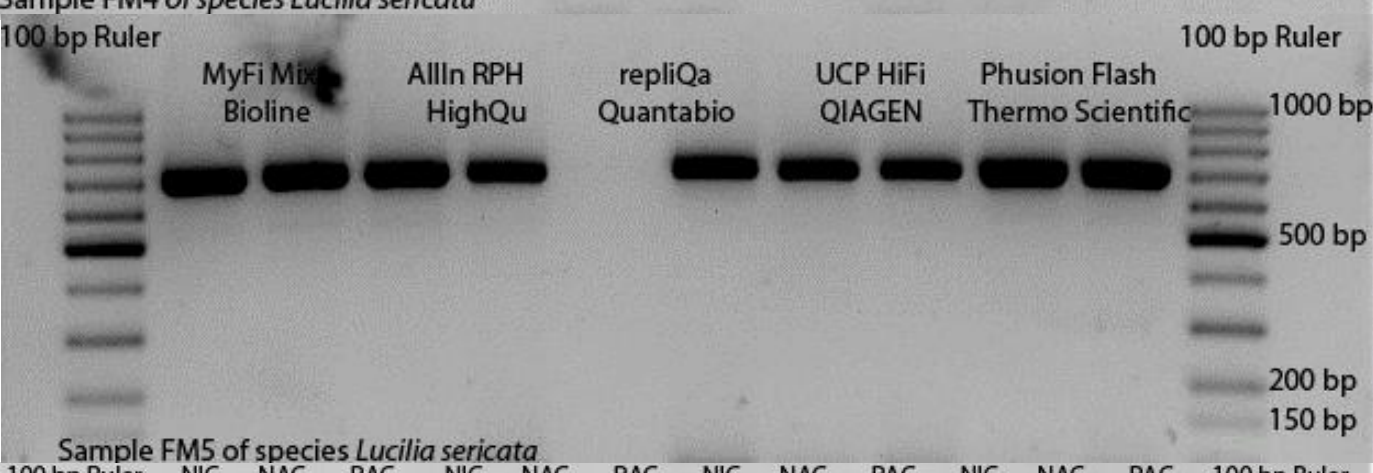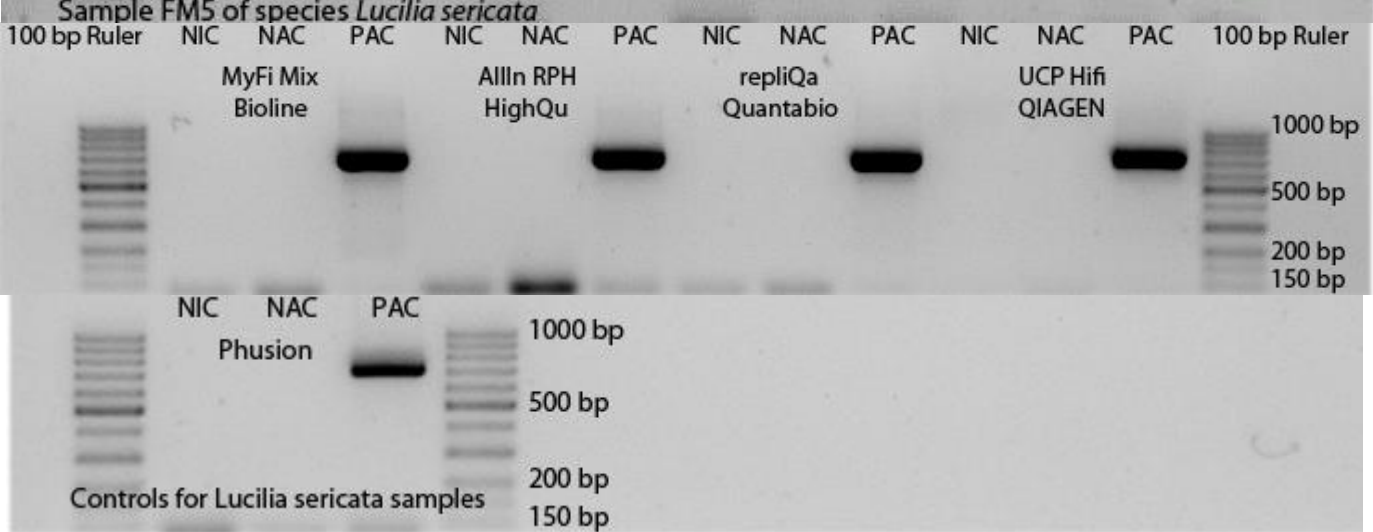

Supplement: s1 [file s1]
